# Supplementary material for: Deletion of Apoptosis Inhibitor F1L in Vaccinia Virus Increases Safety and Oncolysis for Cancer Therapy
Source: PubMed Central journal article supplement — Mol Ther Oncolytics. 2019 Jul 3;14:246–52. doi: 10.1016/j.omto.2019.06.004 (PMC6695278; doi:10.1016/j.omto.2019.06.004), 2019-07-03

**Supplemental Information**

**Deletion of Apoptosis Inhibitor F1L  
in Vaccinia Virus Increases Safety  
and Oncolysis for Cancer Therapy**

**Adrian Pelin, Johann Foloppe, Julia Petryk, Ragunath Singaravelu, Marian Hussein, Florian Gossart, Victoria A. Jennings, Lawton J. Stubbert, Madison Foster, Christopher Storbeck, Antonio Postigo, Elena Scut, Brian Laight, Michael Way, Philippe Erbs, Fabrice Le Boeuf, and John C. Bell**

# Supplementary Figure 1

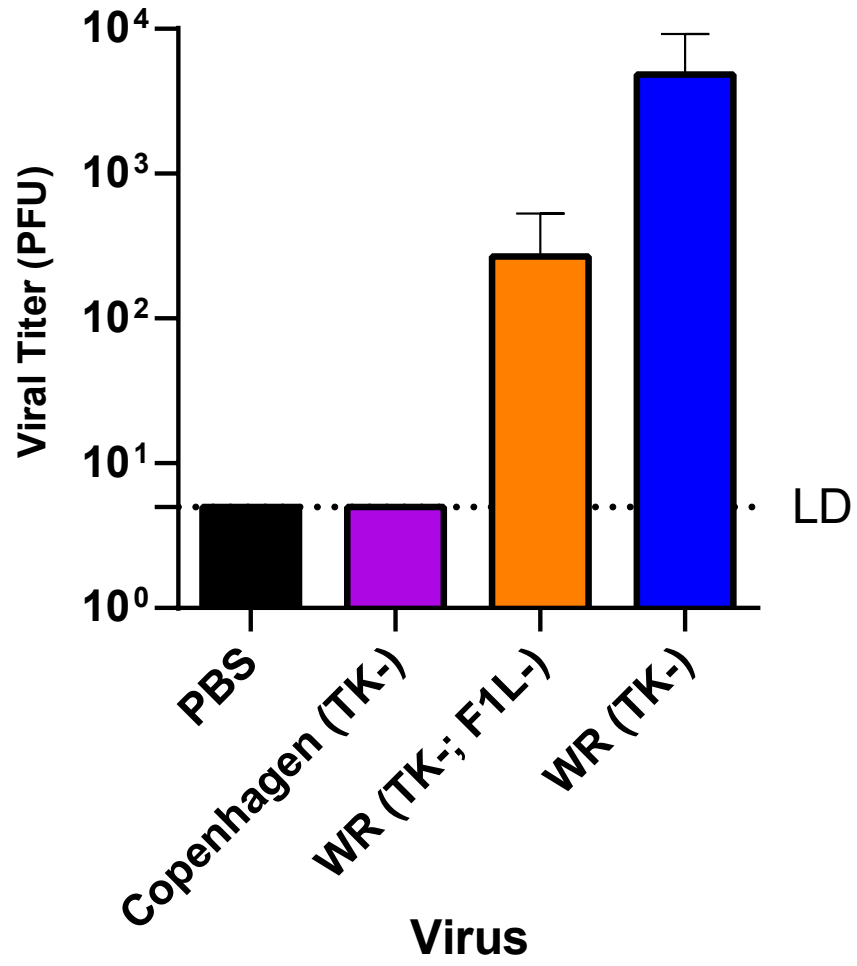

Supplement: mmc1.pdf [file mmc1.pdf]
